# Supplementary material for: The compositional and nano-structural basis of fracture healing in healthy and osteoporotic bone
Source: PubMed Central journal article supplement (PMC5785543; doi:10.1038/s41598-018-19296-z), 2018-01-25

# Supplementary Material

*The compositional and nano-structural basis of fracture healing  
in healthy and osteoporotic bone.*

Neashan Mathavan, Mikael J. Turunen, Manuel Guizar-Sicairos,  
Martin Bech, Florian Schaff, Magnus Tägil, Hanna Isaksson

## **Supplementary Material: Composition**

- Supplementary Table 1. Callus : Control vs. OVX comparisons.
- Supplementary Table 2. Cortex : Control vs. OVX comparisons.
- Supplementary Table 3. Treatment efficacy.
- Supplementary Table 4. Callus/Cortex comparisons.

## **Supplementary Material: Nanostructure**

- Supplementary Table 5. Callus : Control vs. OVX comparisons.
- Supplementary Table 6. Cortex : Control vs. OVX comparisons.
- Supplementary Table 7. Treatment efficacy.
- Supplementary Figure 1. Callus/Cortex comparisons.
- Supplementary Figure 2. Callus/Cortex comparisons: Heterogeneity.

**Supplementary Table 1.** Comparisons between healthy and osteoporotic fracture repair of callus compositional parameters (\*\* p < 0.01).

| Callus (Compositional Parameters) |         |                        |      |         |                              |      |         |                                  |          |         |                               |    |         |
|-----------------------------------|---------|------------------------|------|---------|------------------------------|------|---------|----------------------------------|----------|---------|-------------------------------|----|---------|
| Treatment                         | N       | Mineral - Matrix Ratio |      |         | Crystallinity<br>1030 / 1020 |      |         | Collagen Maturity<br>1660 / 1690 |          |         | Acid Phosphate<br>1127 / 1096 |    |         |
|                                   |         | Mean                   | SD   | p-value | Mean                         | SD   | p-value | Mean                             | SD       | p-value | Mean                          | SD | p-value |
| <i>Untreated</i>                  | Control | 7                      | 3.47 | 0.57    | 1.13                         | 0.04 | 2.36    | 0.07                             | 0.57     | 0.03    |                               |    |         |
|                                   | OVX     | 10                     | 3.16 | 0.26    | 1.13                         | 0.03 | 2.31    | 0.09                             | 0.59     | 0.03    |                               |    |         |
| <i>BMP</i>                        | Control | 9                      | 3.66 | 0.57    | 1.10                         | 0.04 | 2.40    | 0.09                             | 0.58     | 0.03    |                               |    |         |
|                                   | OVX     | 9                      | 3.57 | 0.58    | 1.11                         | 0.03 | 2.27    | 0.10                             | 0.58 (^) | 0.02    | **                            |    |         |
| <i>BMP + ZA</i>                   | Control | 8                      | 4.18 | 0.68    | 1.10                         | 0.05 | 2.34    | 0.10                             | 0.59     | 0.04    |                               |    |         |
|                                   | OVX     | 6                      | 3.98 | 0.36    | 1.12                         | 0.04 | 2.32    | 0.06                             | 0.57     | 0.02    |                               |    |         |

  

| Callus (Compositional Parameters - Heterogeneity) |         |                                         |          |         |                                |      |           |                                    |          |         |                                 |    |         |
|---------------------------------------------------|---------|-----------------------------------------|----------|---------|--------------------------------|------|-----------|------------------------------------|----------|---------|---------------------------------|----|---------|
| Treatment                                         | N       | Mineral - Matrix Ratio<br>Heterogeneity |          |         | Crystallinity<br>Heterogeneity |      |           | Collagen Maturity<br>Heterogeneity |          |         | Acid Phosphate<br>Heterogeneity |    |         |
|                                                   |         | Mean                                    | SD       | p-value | Mean                           | SD   | p-value   | Mean                               | SD       | p-value | Mean                            | SD | p-value |
| <i>Untreated</i>                                  | Control | 7                                       | 1,19 (#) | 0.25    | 0.07                           | 0.02 | 0.25      | 0.07                               | 0.05     | 0.02    |                                 |    |         |
|                                                   | OVX     | 10                                      | 1.18     | 0.12    | 0.08                           | 0.02 | 0,20 (\$) | 0.11                               | 0.05     | 0.02    |                                 |    |         |
| <i>BMP</i>                                        | Control | 9                                       | 0.98     | 0.20    | 0.07                           | 0.01 | 0.27      | 0.17                               | 0.05     | 0.04    |                                 |    |         |
|                                                   | OVX     | 9                                       | 1.09     | 0.22    | 0.07                           | 0.02 | 0.29      | 0.16                               | 0.05     | 0.01    |                                 |    |         |
| <i>BMP + ZA</i>                                   | Control | 8                                       | 1.11     | 0.16    | 0.06                           | 0.01 | 0.28      | 0.11                               | 0.05     | 0.02    |                                 |    |         |
|                                                   | OVX     | 6                                       | 1.15     | 0.18    | 0.06                           | 0.02 | 0.34      | 0.19                               | 0,04 (Ω) | 0.01    |                                 |    |         |

(Ω) denotes N = 5

(#) denotes N = 6

(^ ) denotes N = 8

(\$ ) denotes N = 9

**Supplementary Table 2.** Comparisons between healthy and osteoporotic fracture repair of cortical compositional parameters.

|                  |          | <b>Cortex (Compositional Parameters)</b> |           |                |             |                                      |                |             |           |                                          |             |           |                |                                       |           |                |  |
|------------------|----------|------------------------------------------|-----------|----------------|-------------|--------------------------------------|----------------|-------------|-----------|------------------------------------------|-------------|-----------|----------------|---------------------------------------|-----------|----------------|--|
|                  |          | <b>Mineral - Matrix Ratio</b>            |           |                |             | <b>Crystallinity<br/>1030 / 1020</b> |                |             |           | <b>Collagen Maturity<br/>1660 / 1690</b> |             |           |                | <b>Acid Phosphate<br/>1127 / 1096</b> |           |                |  |
| <b>Treatment</b> | <b>N</b> | <b>Mean</b>                              | <b>SD</b> | <b>p-value</b> | <b>Mean</b> | <b>SD</b>                            | <b>p-value</b> | <b>Mean</b> | <b>SD</b> | <b>p-value</b>                           | <b>Mean</b> | <b>SD</b> | <b>p-value</b> | <b>Mean</b>                           | <b>SD</b> | <b>p-value</b> |  |
| <i>Untreated</i> |          |                                          |           |                |             |                                      |                |             |           |                                          |             |           |                |                                       |           |                |  |
| Control          | 7        | 5.26                                     | 0.63      |                | 1.11        | 0.07                                 |                | 2.49        | 0.11      |                                          | 0.46        | 0.02      |                |                                       |           |                |  |
| OVX              | 10       | 5.30                                     | 0.58      |                | 1.11        | 0.05                                 |                | 2.38        | 0.12      |                                          | 0.48        | 0.02      |                |                                       |           |                |  |
| <i>BMP</i>       |          |                                          |           |                |             |                                      |                |             |           |                                          |             |           |                |                                       |           |                |  |
| Control          | 9        | 5.75                                     | 0.78      |                | 1.07        | 0.05                                 |                | 2.47        | 0.09      |                                          | 0.47        | 0.04      |                |                                       |           |                |  |
| OVX              | 9        | 5.71                                     | 0.53      |                | 1.09        | 0.06                                 |                | 2.46        | 0.13      |                                          | 0.47 (#)    | 0.01      |                |                                       |           |                |  |
| <i>BMP + ZA</i>  |          |                                          |           |                |             |                                      |                |             |           |                                          |             |           |                |                                       |           |                |  |
| Control          | 8        | 5.47                                     | 0.72      |                | 1.09        | 0.07                                 |                | 2.49        | 0.12      |                                          | 0.48        | 0.02      |                |                                       |           |                |  |
| OVX              | 6        | 5.97                                     | 0.74      |                | 1.12        | 0.07                                 |                | 2.45        | 0.12      |                                          | 0.48        | 0.00      |                |                                       |           |                |  |

|                  |          | <b>Cortex (Compositional Parameters - Heterogeneity)</b> |           |                |             |                                        |                |             |           |                                            |             |           |                |                                         |           |                |  |
|------------------|----------|----------------------------------------------------------|-----------|----------------|-------------|----------------------------------------|----------------|-------------|-----------|--------------------------------------------|-------------|-----------|----------------|-----------------------------------------|-----------|----------------|--|
|                  |          | <b>Mineral - Matrix Ratio<br/>Heterogeneity</b>          |           |                |             | <b>Crystallinity<br/>Heterogeneity</b> |                |             |           | <b>Collagen Maturity<br/>Heterogeneity</b> |             |           |                | <b>Acid Phosphate<br/>Heterogeneity</b> |           |                |  |
| <b>Treatment</b> | <b>N</b> | <b>Mean</b>                                              | <b>SD</b> | <b>p-value</b> | <b>Mean</b> | <b>SD</b>                              | <b>p-value</b> | <b>Mean</b> | <b>SD</b> | <b>p-value</b>                             | <b>Mean</b> | <b>SD</b> | <b>p-value</b> | <b>Mean</b>                             | <b>SD</b> | <b>p-value</b> |  |
| <i>Untreated</i> |          |                                                          |           |                |             |                                        |                |             |           |                                            |             |           |                |                                         |           |                |  |
| Control          | 7        | 0.94                                                     | 0.17      |                | 0.06        | 0.02                                   |                | 0.14        | 0.04      |                                            | 0.02        | 0.00      |                |                                         |           |                |  |
| OVX              | 10       | 1.15                                                     | 0.29      |                | 0.07        | 0.01                                   |                | 0.15 (#)    | 0.08      |                                            | 0.02        | 0.01      |                |                                         |           |                |  |
| <i>BMP</i>       |          |                                                          |           |                |             |                                        |                |             |           |                                            |             |           |                |                                         |           |                |  |
| Control          | 9        | 0.95                                                     | 0.15      |                | 0.06        | 0.01                                   |                | 0.16        | 0.07      |                                            | 0.02        | 0.00      |                |                                         |           |                |  |
| OVX              | 9        | 0.91                                                     | 0.18      |                | 0.06        | 0.01                                   |                | 0.14        | 0.08      |                                            | 0.02        | 0.01      |                |                                         |           |                |  |
| <i>BMP + ZA</i>  |          |                                                          |           |                |             |                                        |                |             |           |                                            |             |           |                |                                         |           |                |  |
| Control          | 8        | 0.86                                                     | 0.17      |                | 0.06        | 0.01                                   |                | 0.17        | 0.11      |                                            | 0.02        | 0.02      |                |                                         |           |                |  |
| OVX              | 6        | 1.00                                                     | 0.15      |                | 0.06        | 0.02                                   |                | 0.17        | 0.10      |                                            | 0.02        | 0.01      |                |                                         |           |                |  |

(#) denotes N = 8

**Supplementary Table 3.** Comparison of Treatments: Comparisons of inner callus regions are presented between untreated, BMP-7 and BMP-7 + ZA treatments within either the healthy or the osteoporotic groups. (\* p < 0.05, \*\* p < 0.01, \*\*\* p < 0.001 when compared to Untreated femurs, and o p < 0.05, oo p < 0.01, ooo p < 0.001 when compared to BMP only treated femurs).

| Control (Compositional Parameters) |         |                        |      |         |                           |      |         |                               |      |         |                            |    |         |
|------------------------------------|---------|------------------------|------|---------|---------------------------|------|---------|-------------------------------|------|---------|----------------------------|----|---------|
| Treatment                          | N       | Mineral - Matrix Ratio |      |         | Crystallinity 1030 / 1020 |      |         | Collagen Maturity 1660 / 1690 |      |         | Acid Phosphate 1127 / 1096 |    |         |
|                                    |         | Mean                   | SD   | p-value | Mean                      | SD   | p-value | Mean                          | SD   | p-value | Mean                       | SD | p-value |
| Untreated                          | Control | 7                      | 3.47 | 0.57    | 1.13                      | 0.04 | 2.36    | 0.07                          | 0.57 | 0.03    |                            |    |         |
| BMP                                | Control | 9                      | 3.66 | 0.57    | 1.10                      | 0.04 | 2.40    | 0.09                          | 0.58 | 0.03    |                            |    |         |
| BMP + ZA                           | Control | 8                      | 4.18 | 0.68    | 1.10                      | 0.05 | 2.34    | 0.10                          | 0.59 | 0.04    |                            |    |         |

| OVX (Compositional Parameters) |     |                        |      |         |                           |      |         |                               |      |         |                            |    |         |
|--------------------------------|-----|------------------------|------|---------|---------------------------|------|---------|-------------------------------|------|---------|----------------------------|----|---------|
| Treatment                      | N   | Mineral - Matrix Ratio |      |         | Crystallinity 1030 / 1020 |      |         | Collagen Maturity 1660 / 1690 |      |         | Acid Phosphate 1127 / 1096 |    |         |
|                                |     | Mean                   | SD   | p-value | Mean                      | SD   | p-value | Mean                          | SD   | p-value | Mean                       | SD | p-value |
| Untreated                      | OVX | 10                     | 3.16 | 0.26    | 1.13                      | 0.03 | 2.31    | 0.09                          | 0.59 | 0.03    |                            |    |         |
| BMP                            | OVX | 9                      | 3.57 | 0.58    | 1.11                      | 0.03 | 2.27    | 0.10                          | 0.58 | 0.02    |                            |    |         |
| BMP + ZA                       | OVX | 6                      | 3.98 | 0.36    | 1.12                      | 0.04 | 2.32    | 0.06                          | 0.57 | 0.02    |                            |    |         |

| Control (Compositional Parameters - Heterogeneity) |         |                                      |          |         |                             |      |         |                                 |      |         |                              |    |         |
|----------------------------------------------------|---------|--------------------------------------|----------|---------|-----------------------------|------|---------|---------------------------------|------|---------|------------------------------|----|---------|
| Treatment                                          | N       | Mineral - Matrix Ratio Heterogeneity |          |         | Crystallinity Heterogeneity |      |         | Collagen Maturity Heterogeneity |      |         | Acid Phosphate Heterogeneity |    |         |
|                                                    |         | Mean                                 | SD       | p-value | Mean                        | SD   | p-value | Mean                            | SD   | p-value | Mean                         | SD | p-value |
| Untreated                                          | Control | 7                                    | 1.19 (#) | 0.25    | 0.07                        | 0.02 | 0.25    | 0.07                            | 0.05 | 0.02    |                              |    |         |
| BMP                                                | Control | 9                                    | 0.98     | 0.20    | 0.07                        | 0.01 | 0.27    | 0.17                            | 0.05 | 0.04    |                              |    |         |
| BMP + ZA                                           | Control | 8                                    | 1.11     | 0.16    | 0.06                        | 0.01 | 0.28    | 0.11                            | 0.05 | 0.02    |                              |    |         |

(#) denotes N = 6

| OVX (Compositional Parameters - Heterogeneity) |     |                                      |      |         |                             |      |          |                                 |          |         |                              |    |         |
|------------------------------------------------|-----|--------------------------------------|------|---------|-----------------------------|------|----------|---------------------------------|----------|---------|------------------------------|----|---------|
| Treatment                                      | N   | Mineral - Matrix Ratio Heterogeneity |      |         | Crystallinity Heterogeneity |      |          | Collagen Maturity Heterogeneity |          |         | Acid Phosphate Heterogeneity |    |         |
|                                                |     | Mean                                 | SD   | p-value | Mean                        | SD   | p-value  | Mean                            | SD       | p-value | Mean                         | SD | p-value |
| Untreated                                      | OVX | 10                                   | 1.18 | 0.12    | 0.08                        | 0.02 | 0.20 (§) | 0.11                            | 0.05     | 0.02    |                              |    |         |
| BMP                                            | OVX | 9                                    | 1.09 | 0.22    | 0.07                        | 0.02 | 0.29     | 0.16                            | 0.05     | 0.01    |                              |    |         |
| BMP + ZA                                       | OVX | 6                                    | 1.15 | 0.18    | 0.06                        | 0.02 | 0.34     | 0.19                            | 0.04 (Ω) | 0.01    |                              |    |         |

(§) denotes N = 5

(Ω) denotes N = 9

# Supplementary Table 4. Comparisons between callus and cortex regions.

(\* p < 0.05, \*\* p < 0.01, \*\*\* p < 0.001).

|                     | N  | Mineral-Matrix |      |        |      | p-value | Mineral-Matrix (Heterogeneity) |      |        |      | p-value |
|---------------------|----|----------------|------|--------|------|---------|--------------------------------|------|--------|------|---------|
|                     |    | CALLUS         |      | CORTEX |      |         | CALLUS                         |      | CORTEX |      |         |
|                     |    | Mean           | SD   | Mean   | SD   |         | Mean                           | SD   | Mean   | SD   |         |
| Untreated (Control) | 7  | 3.47           | 0.57 | 5.26   | 0.63 | ***     | 1.19                           | 0.25 | 0.94   | 0.17 | *       |
| Untreated (OVX)     | 10 | 3.16           | 0.26 | 5.30   | 0.58 | ***     | 1.18                           | 0.12 | 1.15   | 0.29 |         |
| BMP (Control)       | 9  | 3.66           | 0.57 | 5.75   | 0.78 | ***     | 0.98                           | 0.20 | 0.95   | 0.15 |         |
| BMP (OVX)           | 9  | 3.57           | 0.58 | 5.71   | 0.53 | ***     | 1.09                           | 0.22 | 0.91   | 0.18 |         |
| BMP + ZA (Control)  | 8  | 4.18           | 0.68 | 5.47   | 0.72 | ***     | 1.11                           | 0.16 | 0.86   | 0.17 | *       |
| BMP + ZA (OVX)      | 6  | 3.98           | 0.36 | 5.97   | 0.74 | ***     | 1.15                           | 0.18 | 1.00   | 0.15 | *       |

|                     | N  | Crystallinity |      |        |      | p-value | Crystallinity (Heterogeneity) |      |        |      | p-value |
|---------------------|----|---------------|------|--------|------|---------|-------------------------------|------|--------|------|---------|
|                     |    | CALLUS        |      | CORTEX |      |         | CALLUS                        |      | CORTEX |      |         |
|                     |    | Mean          | SD   | Mean   | SD   |         | Mean                          | SD   | Mean   | SD   |         |
| Untreated (Control) | 7  | 1.13          | 0.04 | 1.11   | 0.07 |         | 0.07                          | 0.02 | 0.06   | 0.02 |         |
| Untreated (OVX)     | 10 | 1.13          | 0.03 | 1.11   | 0.05 |         | 0.08                          | 0.02 | 0.07   | 0.01 |         |
| BMP (Control)       | 9  | 1.10          | 0.04 | 1.07   | 0.05 | *       | 0.07                          | 0.01 | 0.06   | 0.01 | *       |
| BMP (OVX)           | 9  | 1.11          | 0.03 | 1.09   | 0.06 |         | 0.07                          | 0.02 | 0.06   | 0.01 |         |
| BMP + ZA (Control)  | 8  | 1.10          | 0.05 | 1.09   | 0.07 |         | 0.06                          | 0.01 | 0.06   | 0.01 |         |
| BMP + ZA (OVX)      | 6  | 1.12          | 0.04 | 1.12   | 0.07 |         | 0.06                          | 0.02 | 0.06   | 0.02 |         |

|                     | N  | Collagen Maturity |      |        |      | p-value | Collagen Maturity (Heterogeneity) |      |        |      | p-value |
|---------------------|----|-------------------|------|--------|------|---------|-----------------------------------|------|--------|------|---------|
|                     |    | CALLUS            |      | CORTEX |      |         | CALLUS                            |      | CORTEX |      |         |
|                     |    | Mean              | SD   | Mean   | SD   |         | Mean                              | SD   | Mean   | SD   |         |
| Untreated (Control) | 7  | 2.36              | 0.07 | 2.49   | 0.11 | **      | 0.25                              | 0.07 | 0.14   | 0.04 | *       |
| Untreated (OVX)     | 10 | 2.31              | 0.09 | 2.38   | 0.12 |         | 0.20                              | 0.11 | 0.15   | 0.08 |         |
| BMP (Control)       | 9  | 2.40              | 0.09 | 2.47   | 0.09 | *       | 0.27                              | 0.17 | 0.16   | 0.07 |         |
| BMP (OVX)           | 9  | 2.27              | 0.10 | 2.46   | 0.13 | **      | 0.29                              | 0.16 | 0.14   | 0.08 | *       |
| BMP + ZA (Control)  | 8  | 2.34              | 0.10 | 2.49   | 0.12 | **      | 0.28                              | 0.11 | 0.17   | 0.11 |         |
| BMP + ZA (OVX)      | 6  | 2.32              | 0.06 | 2.45   | 0.12 | *       | 0.34                              | 0.19 | 0.17   | 0.10 |         |

|                     | N  | Acid Phosphate |       |        |       | p-value | Acid Phosphate (Heterogeneity) |       |        |       | p-value |
|---------------------|----|----------------|-------|--------|-------|---------|--------------------------------|-------|--------|-------|---------|
|                     |    | CALLUS         |       | CORTEX |       |         | CALLUS                         |       | CORTEX |       |         |
|                     |    | Mean           | SD    | Mean   | SD    |         | Mean                           | SD    | Mean   | SD    |         |
| Untreated (Control) | 7  | 0.573          | 0.025 | 0.463  | 0.022 | ***     | 0.050                          | 0.020 | 0.018  | 0.004 | *       |
| Untreated (OVX)     | 10 | 0.586          | 0.031 | 0.475  | 0.016 | ***     | 0.051                          | 0.022 | 0.021  | 0.005 | **      |
| BMP (Control)       | 9  | 0.584          | 0.029 | 0.467  | 0.040 | ***     | 0.052                          | 0.040 | 0.021  | 0.004 | *       |
| BMP (OVX)           | 9  | 0.585          | 0.025 | 0.468  | 0.013 | ***     | 0.052                          | 0.013 | 0.023  | 0.014 | *       |
| BMP + ZA (Control)  | 8  | 0.587          | 0.042 | 0.476  | 0.023 | ***     | 0.048                          | 0.025 | 0.025  | 0.018 | *       |
| BMP + ZA (OVX)      | 6  | 0.573          | 0.024 | 0.478  | 0.002 | ***     | 0.040                          | 0.015 | 0.025  | 0.009 | *       |

**Supplementary Table 5. Comparisons between healthy and osteoporotic fracture repair of nanostructural parameters in callus regions (\* p < 0.05, \*\* p < 0.01).**

| Inner Callus (Nanostructural parameters) |         |                       |      |         |                                   |      |         |                       |       |         |                             |      |         |                            |      |         |                                   |     |         |   |
|------------------------------------------|---------|-----------------------|------|---------|-----------------------------------|------|---------|-----------------------|-------|---------|-----------------------------|------|---------|----------------------------|------|---------|-----------------------------------|-----|---------|---|
| Treatment                                | N       | Crystal Thickness (Å) |      |         | Predominant Orientation (degrees) |      |         | Degree of Orientation |       |         | D 002 - Crystal Length (nm) |      |         | D 310 - Crystal Width (nm) |      |         | Crystal Volume (nm <sup>3</sup> ) |     |         |   |
|                                          |         | Mean                  | SD   | p-value | Mean                              | SD   | p-value | Mean                  | SD    | p-value | Mean                        | SD   | p-value | Mean                       | SD   | p-value | Mean                              | SD  | p-value |   |
| Untreated                                | Control | 7                     | 21.5 | 1.23    | -33.2                             | 6.14 |         | 0.59                  | 0.006 | *       | -                           | -    | -       | -                          | -    | -       | -                                 | -   | -       | - |
|                                          | OVX     | 5                     | 22.8 | 1.14    | -25.9                             | 15.7 |         | 0.60                  | 0.009 |         | -                           | -    | -       | -                          | -    | -       | -                                 | -   | -       | - |
| BMP                                      | Control | 6-7                   | 22.3 | 0.92    | -2.7                              | 17.1 |         | 0.58                  | 0.009 | **      | 346.9                       | 2.05 |         | 139.2                      | 2.04 |         | 1093                              | 62  |         |   |
|                                          | OVX     | 6-7                   | 22.6 | 1.85    | -14.1                             | 28.6 |         | 0.59                  | 0.005 |         | 350.0                       | 3.87 |         | 141.3                      | 3.69 |         | 1141                              | 134 |         |   |
| BMP + ZA                                 | Control | 5-7                   | 21.8 | 0.89    | -13.4                             | 26.9 |         | 0.57                  | 0.008 |         | 346.3                       | 2.67 |         | 140.7                      | 2.12 |         | 1077                              | 49  |         |   |
|                                          | OVX     | 5-7                   | 22.4 | 1.22    | 0.48                              | 24.9 |         | 0.58                  | 0.015 |         | 349.43                      | 4.74 |         | 140.7                      | 4.61 |         | 1100                              | 111 |         |   |

| Inner Callus (Nanostructural parameters - Heterogeneity) |         |                       |      |         |                                   |      |         |                       |       |         |                             |      |         |                            |      |         |                                   |    |         |   |
|----------------------------------------------------------|---------|-----------------------|------|---------|-----------------------------------|------|---------|-----------------------|-------|---------|-----------------------------|------|---------|----------------------------|------|---------|-----------------------------------|----|---------|---|
| Treatment                                                | N       | Crystal Thickness (Å) |      |         | Predominant Orientation (degrees) |      |         | Degree of Orientation |       |         | D 002 - Crystal Length (nm) |      |         | D 310 - Crystal Width (nm) |      |         | Crystal Volume (nm <sup>3</sup> ) |    |         |   |
|                                                          |         | Mean                  | SD   | p-value | Mean                              | SD   | p-value | Mean                  | SD    | p-value | Mean                        | SD   | p-value | Mean                       | SD   | p-value | Mean                              | SD | p-value |   |
| Untreated                                                | Control | 7                     | 2.30 | 0.34    | 51.9                              | 6.09 |         | 0.081                 | 0.01  |         | -                           | -    | -       | -                          | -    | -       | -                                 | -  | -       | - |
|                                                          | OVX     | 5                     | 2.31 | 0.23    | 44.3                              | 4.09 |         | 0.069                 | 0.01  |         | -                           | -    | -       | -                          | -    | -       | -                                 | -  | -       | - |
| BMP                                                      | Control | 6-7                   | 2.90 | 0.68    | 66.0                              | 9.13 | *       | 0.045                 | 0.006 | *       | 11.8                        | 1.65 |         | 23.0                       | 1.11 |         | 259                               | 45 |         | * |
|                                                          | OVX     | 6-7                   | 3.83 | 0.69    | 54.7                              | 13.6 |         | 0.055                 | 0.007 |         | 17.5                        | 4.00 | **      | 24.5                       | 1.66 |         | 317                               | 29 |         |   |
| BMP + ZA                                                 | Control | 5-7                   | 2.16 | 0.39    | 57.4                              | 14.8 |         | 0.038                 | 0.004 |         | 9.5                         | 1.15 |         | 21.8                       | 0.50 |         | 221                               | 11 |         |   |
|                                                          | OVX     | 5-7                   | 2.39 | 0.74    | 64.65                             | 7.40 |         | 0.043                 | 0.006 |         | 11.40                       | 3.49 |         | 23.0                       | 1.83 |         | 249                               | 46 |         |   |

| Outer Callus (Nanostructural parameters) |         |                       |      |         |                                   |       |         |                       |       |         |                            |      |         |                           |      |         |                                   |     |         |   |
|------------------------------------------|---------|-----------------------|------|---------|-----------------------------------|-------|---------|-----------------------|-------|---------|----------------------------|------|---------|---------------------------|------|---------|-----------------------------------|-----|---------|---|
| Treatment                                | N       | Crystal Thickness (Å) |      |         | Predominant Orientation (degrees) |       |         | Degree of Orientation |       |         | D 002 - Crystal Length (Å) |      |         | D 310 - Crystal Width (Å) |      |         | Crystal Volume (nm <sup>3</sup> ) |     |         |   |
|                                          |         | Mean                  | SD   | p-value | Mean                              | SD    | p-value | Mean                  | SD    | p-value | Mean                       | SD   | p-value | Mean                      | SD   | p-value | Mean                              | SD  | p-value |   |
| Untreated                                | Control | 7                     | 22.8 | 1.13    | -18.41                            | 12.91 |         | 0.59                  | 0.004 | *       | -                          | -    | -       | -                         | -    | -       | -                                 | -   | -       | - |
|                                          | OVX     | 5                     | 22.4 | 1.07    | -12.64                            | 10.18 |         | 0.60                  | 0.015 |         | -                          | -    | -       | -                         | -    | -       | -                                 | -   | -       | - |
| BMP                                      | Control | 6-7                   | 23.0 | 0.72    | 3.0                               | 12.3  |         | 0.58                  | 0.01  | **      | 348.9                      | 3.5  |         | 144.3                     | 2.62 | *       | 1166                              | 59  |         |   |
|                                          | OVX     | 6-7                   | 24.7 | 2.60    | -4.50                             | 19.04 |         | 0.61                  | 0.03  |         | 354.2                      | 10.8 |         | 147.9                     | 2.64 |         | 1308                              | 193 |         |   |
| BMP + ZA                                 | Control | 5-7                   | 22.9 | 1.02    | -0.6                              | 9.9   |         | 0.58                  | 0.01  |         | 350.3                      | 2.7  |         | 144.7                     | 0.95 |         | 1181                              | 44  |         |   |
|                                          | OVX     | 5-7                   | 23.8 | 1.27    | 1.0                               | 22.1  |         | 0.59                  | 0.02  |         | 353.5                      | 3.5  |         | 146.0                     | 3.56 |         | 1256                              | 109 |         |   |

| Outer Callus (Nanostructural parameters - Heterogeneity) |         |                       |      |         |                                   |       |         |                       |       |         |                             |      |         |                            |      |         |                                   |    |         |   |
|----------------------------------------------------------|---------|-----------------------|------|---------|-----------------------------------|-------|---------|-----------------------|-------|---------|-----------------------------|------|---------|----------------------------|------|---------|-----------------------------------|----|---------|---|
| Treatment                                                | N       | Crystal Thickness (Å) |      |         | Predominant Orientation (degrees) |       |         | Degree of Orientation |       |         | D 002 - Crystal Length (nm) |      |         | D 310 - Crystal Width (nm) |      |         | Crystal Volume (nm <sup>3</sup> ) |    |         |   |
|                                                          |         | Mean                  | SD   | p-value | Mean                              | SD    | p-value | Mean                  | SD    | p-value | Mean                        | SD   | p-value | Mean                       | SD   | p-value | Mean                              | SD | p-value |   |
| Untreated                                                | Control | 7                     | 2.03 | 0.40    | 42.1                              | 6.28  |         | 0.056                 | 0.02  |         | -                           | -    | -       | -                          | -    | -       | -                                 | -  | -       | - |
|                                                          | OVX     | 5                     | 2.09 | 0.51    | 35.77                             | 6.20  |         | 0.057                 | 0.01  |         | -                           | -    | -       | -                          | -    | -       | -                                 | -  | -       | - |
| BMP                                                      | Control | 6-7                   | 2.02 | 0.10    | 56.7                              | 10.06 | *       | 0.042                 | 0.004 | *       | 18.5                        | 9.0  |         | 18.8                       | 0.33 |         | 213                               | 8  |         | * |
|                                                          | OVX     | 6-7                   | 2.88 | 1.12    | 41.1                              | 15.78 |         | 0.058                 | 0.013 |         | 24.5                        | 15.7 |         | 20.6                       | 1.78 |         | 302                               | 69 |         |   |
| BMP + ZA                                                 | Control | 5-7                   | 2.03 | 0.32    | 49.0                              | 16.36 |         | 0.043                 | 0.005 |         | 13.4                        | 2.1  |         | 20.3                       | 2.34 |         | 226                               | 25 |         |   |
|                                                          | OVX     | 5-7                   | 2.36 | 0.66    | 53.6                              | 7.60  |         | 0.052                 | 0.014 |         | 15.5                        | 2.4  |         | 20.8                       | 1.24 |         | 261                               | 31 |         |   |

**Supplementary Table 6.** Comparisons between healthy and osteoporotic fracture repair of nanostructural parameters in cortical regions (\* p < 0.05, \*\* p < 0.01).

| Cortex (Nanostructural parameters) |         |                       |      |         |                                   |      |         |                       |      |         |                            |      |         |                           |      |         |                                   |     |         |
|------------------------------------|---------|-----------------------|------|---------|-----------------------------------|------|---------|-----------------------|------|---------|----------------------------|------|---------|---------------------------|------|---------|-----------------------------------|-----|---------|
| Treatment                          | N       | Crystal Thickness (Å) |      |         | Predominant Orientation (degrees) |      |         | Degree of Orientation |      |         | D 002 - Crystal Length (Å) |      |         | D 310 - Crystal Width (Å) |      |         | Crystal Volume (nm <sup>3</sup> ) |     |         |
|                                    |         | Mean                  | SD   | p-value | Mean                              | SD   | p-value | Mean                  | SD   | p-value | Mean                       | SD   | p-value | Mean                      | SD   | p-value | Mean                              | SD  | p-value |
| Untreated                          | Control | 24.1                  | 0.90 |         | -7.20                             | 5.55 |         | 0.63                  | 0.01 |         | -                          | -    | -       | -                         | -    | -       | -                                 | -   | -       |
|                                    | OVX     | 25.3                  | 1.49 |         | -8.08                             | 2.70 | *       | 0.68                  | 0.04 |         | -                          | -    | -       | -                         | -    | -       | -                                 | -   | -       |
| BMP                                | Control | 25.0                  | 2.11 |         | -4.8                              | 5.1  |         | 0.65                  | 0.02 |         | 303.4                      | 39.9 |         | 141.5                     | 2.12 |         | 1075                              | 188 |         |
|                                    | OVX     | 25.4                  | 2.92 |         | -3.36                             | 8.80 |         | 0.68                  | 0.03 |         | 316.4                      | 49.3 |         | 141.2                     | 1.23 |         | 1130                              | 278 |         |
| BMP + ZA                           | Control | 25.7                  | 1.90 |         | -3.2                              | 4.6  |         | 0.66                  | 0.03 |         | 336.6                      | 14.8 |         | 143.7                     | 3.78 |         | 1264                              | 150 |         |
|                                    | OVX     | 24.6                  | 1.12 |         | -5.8                              | 8.3  |         | 0.65                  | 0.01 |         | 328.1                      | 26.4 |         | 142.6                     | 0.88 |         | 1167                              | 111 |         |

  

| Cortex (Nanostructural parameters - Heterogeneity) |         |                       |      |         |                                   |      |         |                       |       |         |                             |      |         |                            |      |         |                                   |    |         |
|----------------------------------------------------|---------|-----------------------|------|---------|-----------------------------------|------|---------|-----------------------|-------|---------|-----------------------------|------|---------|----------------------------|------|---------|-----------------------------------|----|---------|
| Treatment                                          | N       | Crystal Thickness (Å) |      |         | Predominant Orientation (degrees) |      |         | Degree of Orientation |       |         | D 002 - Crystal Length (nm) |      |         | D 310 - Crystal Width (nm) |      |         | Crystal Volume (nm <sup>3</sup> ) |    |         |
|                                                    |         | Mean                  | SD   | p-value | Mean                              | SD   | p-value | Mean                  | SD    | p-value | Mean                        | SD   | p-value | Mean                       | SD   | p-value | Mean                              | SD | p-value |
| Untreated                                          | Control | 3.14                  | 0.63 |         | 11.3                              | 3.87 |         | 0.051                 | 0.009 |         | -                           | -    | -       | -                          | -    | -       | -                                 | -  | -       |
|                                                    | OVX     | 3.04                  | 0.52 |         | 8.88                              | 5.18 |         | 0.064                 | 0.009 |         | -                           | -    | -       | -                          | -    | -       | -                                 | -  | -       |
| BMP                                                | Control | 2.84                  | 0.46 |         | 21.0                              | 7.27 |         | 0.059                 | 0.006 |         | 53.2                        | 21.8 |         | 17.2                       | 2.13 |         | 274                               | 36 |         |
|                                                    | OVX     | 2.61                  | 0.58 |         | 14.1                              | 4.03 |         | 0.063                 | 0.017 |         | 43.2                        | 23.5 |         | 16.8                       | 1.19 |         | 261                               | 49 |         |
| BMP + ZA                                           | Control | 3.17                  | 0.37 |         | 14.0                              | 7.66 |         | 0.057                 | 0.012 |         | 41.4                        | 20.0 |         | 17.3                       | 1.23 |         | 310                               | 43 |         |
|                                                    | OVX     | 2.86                  | 0.42 |         | 18.0                              | 9.30 |         | 0.055                 | 0.009 |         | 47.5                        | 14.3 |         | 17.2                       | 0.79 |         | 298                               | 38 |         |

**Supplementary Table 7.** Comparison of Treatments: Comparisons of inner callus regions are presented between untreated, BMP-7 and BMP-7 + ZA treatments within either the healthy or the osteoporotic groups. (\* p < 0.05, \*\* p < 0.01, \*\*\* p < 0.001 when compared to Untreated femurs, and o p < 0.05, oo p < 0.01, ooo p < 0.001 when compared to BMP only treated femurs).

| Control (Nanostructural Parameters) |     |                       |      |         |                                   |      |         |                       |       |         |                            |      |         |                           |      |         |                                   |    |         |
|-------------------------------------|-----|-----------------------|------|---------|-----------------------------------|------|---------|-----------------------|-------|---------|----------------------------|------|---------|---------------------------|------|---------|-----------------------------------|----|---------|
| Treatment                           | N   | Crystal Thickness (Å) |      |         | Predominant Orientation (degrees) |      |         | Degree of Orientation |       |         | D 002 - Crystal Length (Å) |      |         | D 310 - Crystal Width (Å) |      |         | Crystal Volume (nm <sup>3</sup> ) |    |         |
|                                     |     | Mean                  | SD   | p-value | Mean                              | SD   | p-value | Mean                  | SD    | p-value | Mean                       | SD   | p-value | Mean                      | SD   | p-value | Mean                              | SD | p-value |
| Untreated                           | 7   | 21.5                  | 1.23 |         | -33.2                             | 6.1  |         | 0.59                  | 0.006 |         | -                          | -    | -       | -                         | -    | -       | -                                 | -  | -       |
| BMP                                 | 6-7 | 22.3                  | 0.92 | **      | -2.7                              | 17.1 | **      | 0.58                  | 0.009 | *       | 346.9                      | 2.05 |         | 139.2                     | 2.04 |         | 1093                              | 62 |         |
| BMP + ZA                            | 5-7 | 21.8                  | 0.89 |         | -13.4                             | 26.9 |         | 0.57                  | 0.008 | ooo     | 346.3                      | 2.67 |         | 140.7                     | 2.12 |         | 1077                              | 49 |         |

| Control (Nanostructural Parameters - Heterogeneity) |     |                       |      |         |                                   |      |         |                       |       |         |                            |      |         |                           |      |         |                                   |    |         |
|-----------------------------------------------------|-----|-----------------------|------|---------|-----------------------------------|------|---------|-----------------------|-------|---------|----------------------------|------|---------|---------------------------|------|---------|-----------------------------------|----|---------|
| Treatment                                           | N   | Crystal Thickness (Å) |      |         | Predominant Orientation (degrees) |      |         | Degree of Orientation |       |         | D 002 - Crystal Length (Å) |      |         | D 310 - Crystal Width (Å) |      |         | Crystal Volume (nm <sup>3</sup> ) |    |         |
|                                                     |     | Mean                  | SD   | p-value | Mean                              | SD   | p-value | Mean                  | SD    | p-value | Mean                       | SD   | p-value | Mean                      | SD   | p-value | Mean                              | SD | p-value |
| Untreated                                           | 7   | 2.30                  | 0.34 |         | 51.9                              | 6.09 |         | 0.08                  | 0.013 |         | -                          | -    | -       | -                         | -    | -       | -                                 | -  | -       |
| BMP                                                 | 6-7 | 2.90                  | 0.68 | *       | 66.0                              | 9.13 | *       | 0.05                  | 0.006 | **      | 11.8                       | 1.65 |         | 23.0                      | 1.11 |         | 259                               | 45 |         |
| BMP + ZA                                            | 5-7 | 2.16                  | 0.39 | o       | 57.4                              | 14.8 |         | 0.04                  | 0.004 | ooo     | 9.46                       | 1.15 | (Ω)     | 21.8                      | 0.50 |         | 221                               | 11 |         |

| OVX (Nanostructural Parameters) |     |                       |      |         |                                   |       |         |                       |       |         |                            |      |         |                           |      |         |                                   |     |         |
|---------------------------------|-----|-----------------------|------|---------|-----------------------------------|-------|---------|-----------------------|-------|---------|----------------------------|------|---------|---------------------------|------|---------|-----------------------------------|-----|---------|
| Treatment                       | N   | Crystal Thickness (Å) |      |         | Predominant Orientation (degrees) |       |         | Degree of Orientation |       |         | D 002 - Crystal Length (Å) |      |         | D 310 - Crystal Width (Å) |      |         | Crystal Volume (nm <sup>3</sup> ) |     |         |
|                                 |     | Mean                  | SD   | p-value | Mean                              | SD    | p-value | Mean                  | SD    | p-value | Mean                       | SD   | p-value | Mean                      | SD   | p-value | Mean                              | SD  | p-value |
| Untreated                       | 5   | 22.8                  | 1.14 |         | -25.9                             | 15.7  |         | 0.60                  | 0.009 |         | -                          | -    | -       | -                         | -    | -       | -                                 | -   | -       |
| BMP                             | 6-7 | 22.6                  | 1.85 |         | -14.1                             | 28.6  |         | 0.59                  | 0.005 | *       | 350.0                      | 3.87 |         | 141.3                     | 3.69 |         | 1141                              | 134 |         |
| BMP + ZA                        | 5-7 | 22.4                  | 1.22 |         | 0.48                              | 24.94 |         | 0.58                  | 0.015 | ooo     | 349.4                      | 4.74 |         | 140.7                     | 4.61 |         | 1100                              | 111 |         |

| OVX (Nanostructural Parameters - Heterogeneity) |     |                       |      |         |                                   |      |         |                       |       |         |                            |      |         |                           |      |         |                                   |    |         |
|-------------------------------------------------|-----|-----------------------|------|---------|-----------------------------------|------|---------|-----------------------|-------|---------|----------------------------|------|---------|---------------------------|------|---------|-----------------------------------|----|---------|
| Treatment                                       | N   | Crystal Thickness (Å) |      |         | Predominant Orientation (degrees) |      |         | Degree of Orientation |       |         | D 002 - Crystal Length (Å) |      |         | D 310 - Crystal Width (Å) |      |         | Crystal Volume (nm <sup>3</sup> ) |    |         |
|                                                 |     | Mean                  | SD   | p-value | Mean                              | SD   | p-value | Mean                  | SD    | p-value | Mean                       | SD   | p-value | Mean                      | SD   | p-value | Mean                              | SD | p-value |
| Untreated                                       | 5   | 2.31                  | 0.23 |         | 44.3                              | 4.09 |         | 0.07                  | 0.015 |         | -                          | -    | -       | -                         | -    | -       | -                                 | -  | -       |
| BMP                                             | 6-7 | 3.83                  | 0.69 | **      | 54.7                              | 13.6 |         | 0.05                  | 0.007 | *       | 17.5                       | 4.00 |         | 24.5                      | 1.66 |         | 317                               | 29 |         |
| BMP + ZA                                        | 5-7 | 2.39                  | 0.74 | oo      | 64.65                             | 7.40 | **      | 0.04                  | 0.006 | ooo     | 11.4                       | 3.49 | o       | 23.0                      | 1.83 |         | 249                               | 46 | (Ω)     |

(Ω) p = 0.052 when compared to BMP



# Supplementary Figure 1. Callus – Cortex Comparisons

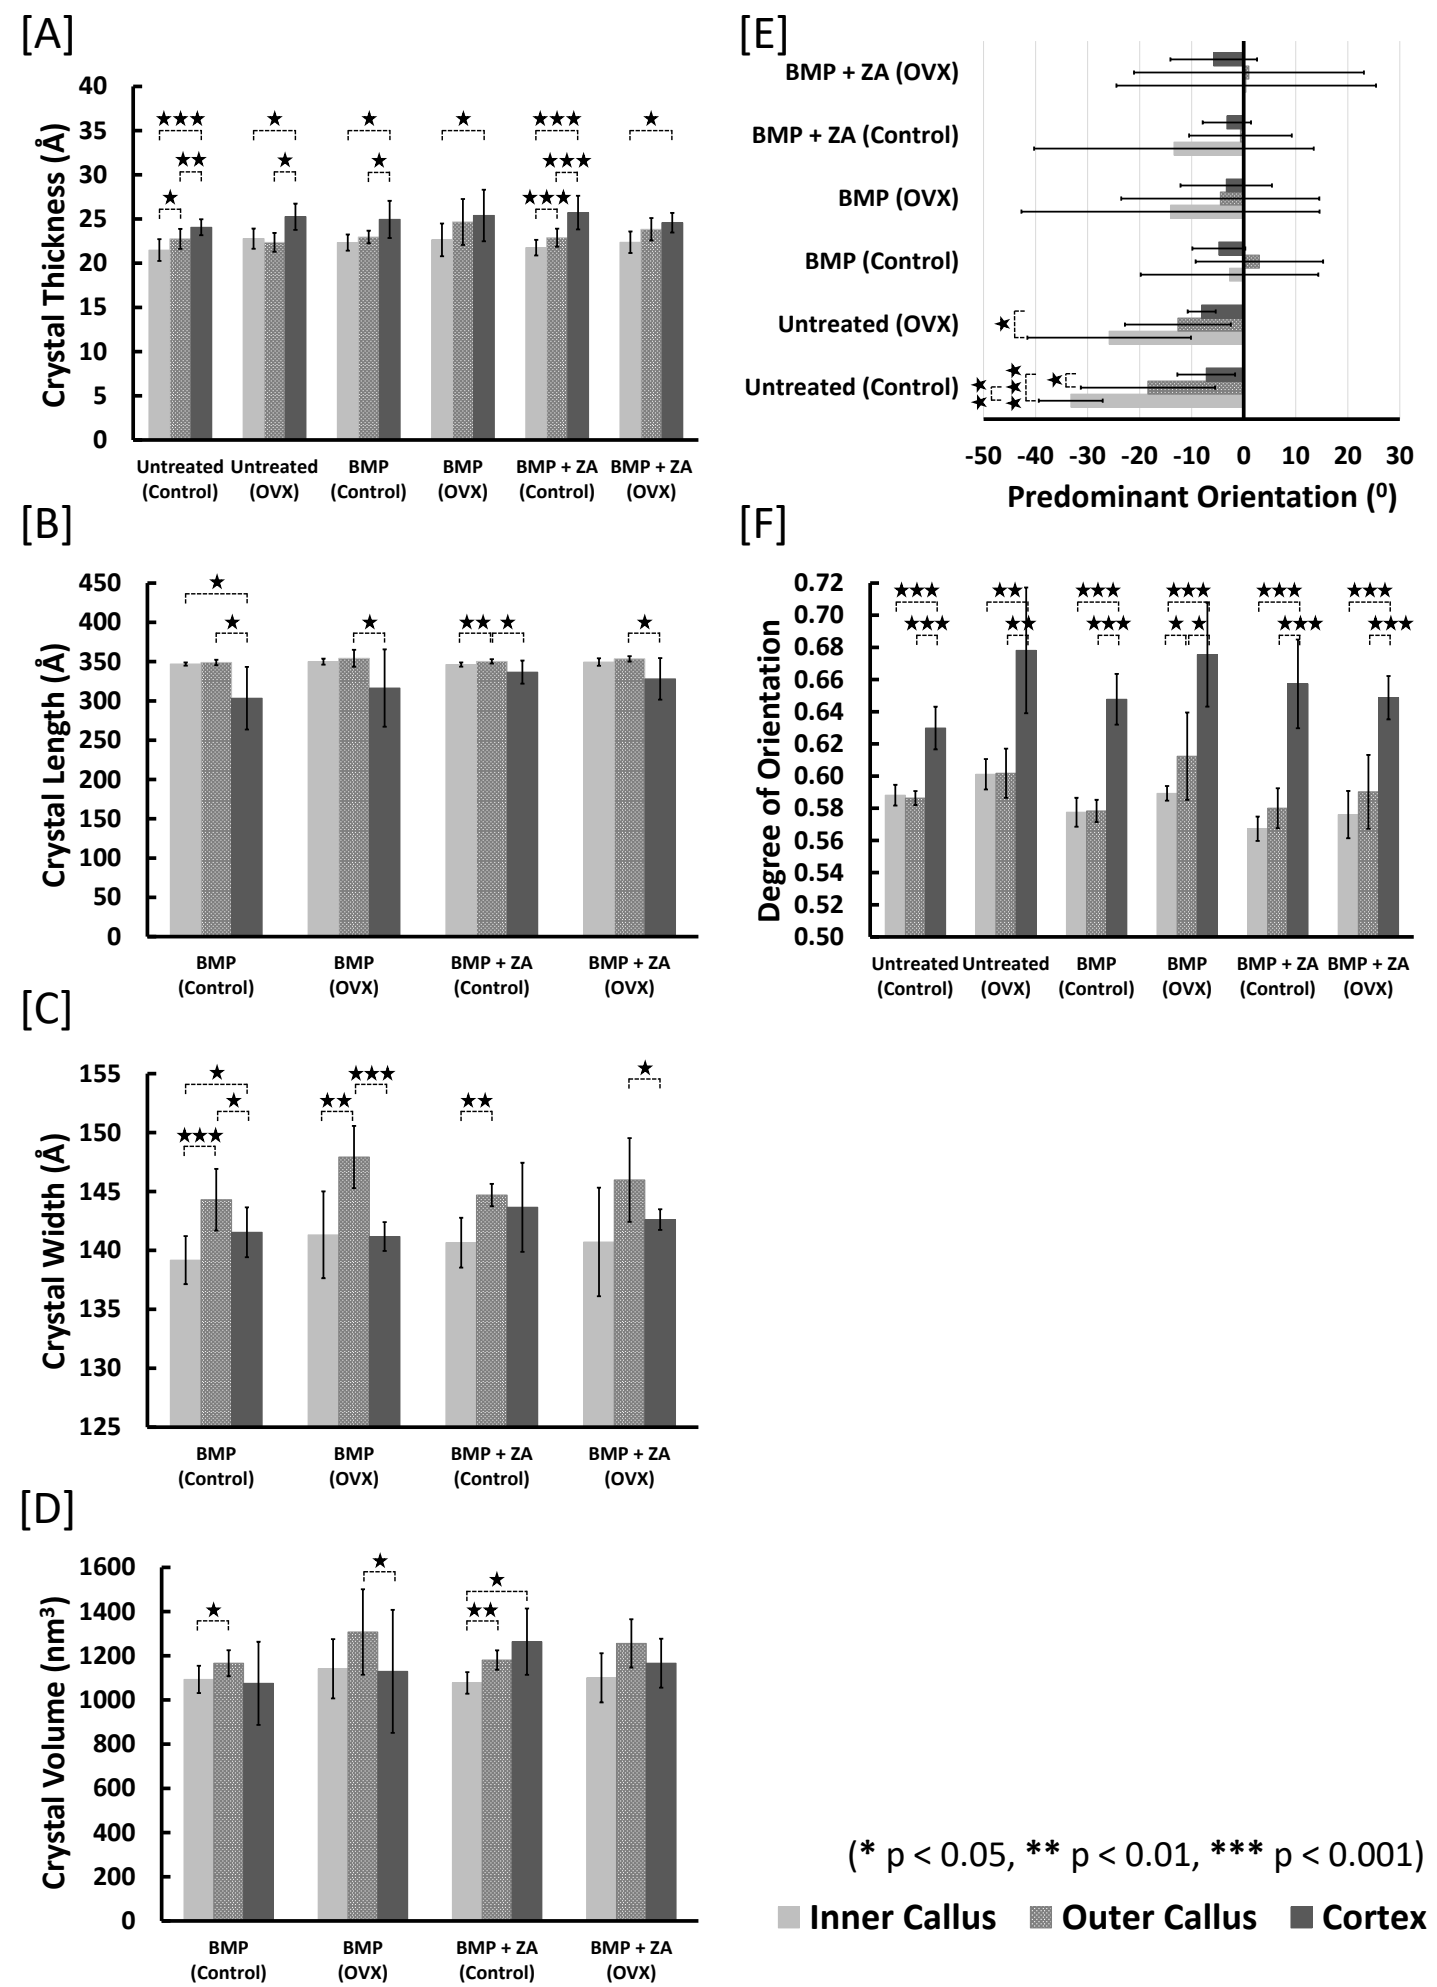

# Supplementary Figure 2. Callus – Cortex Comparisons: Heterogeneity

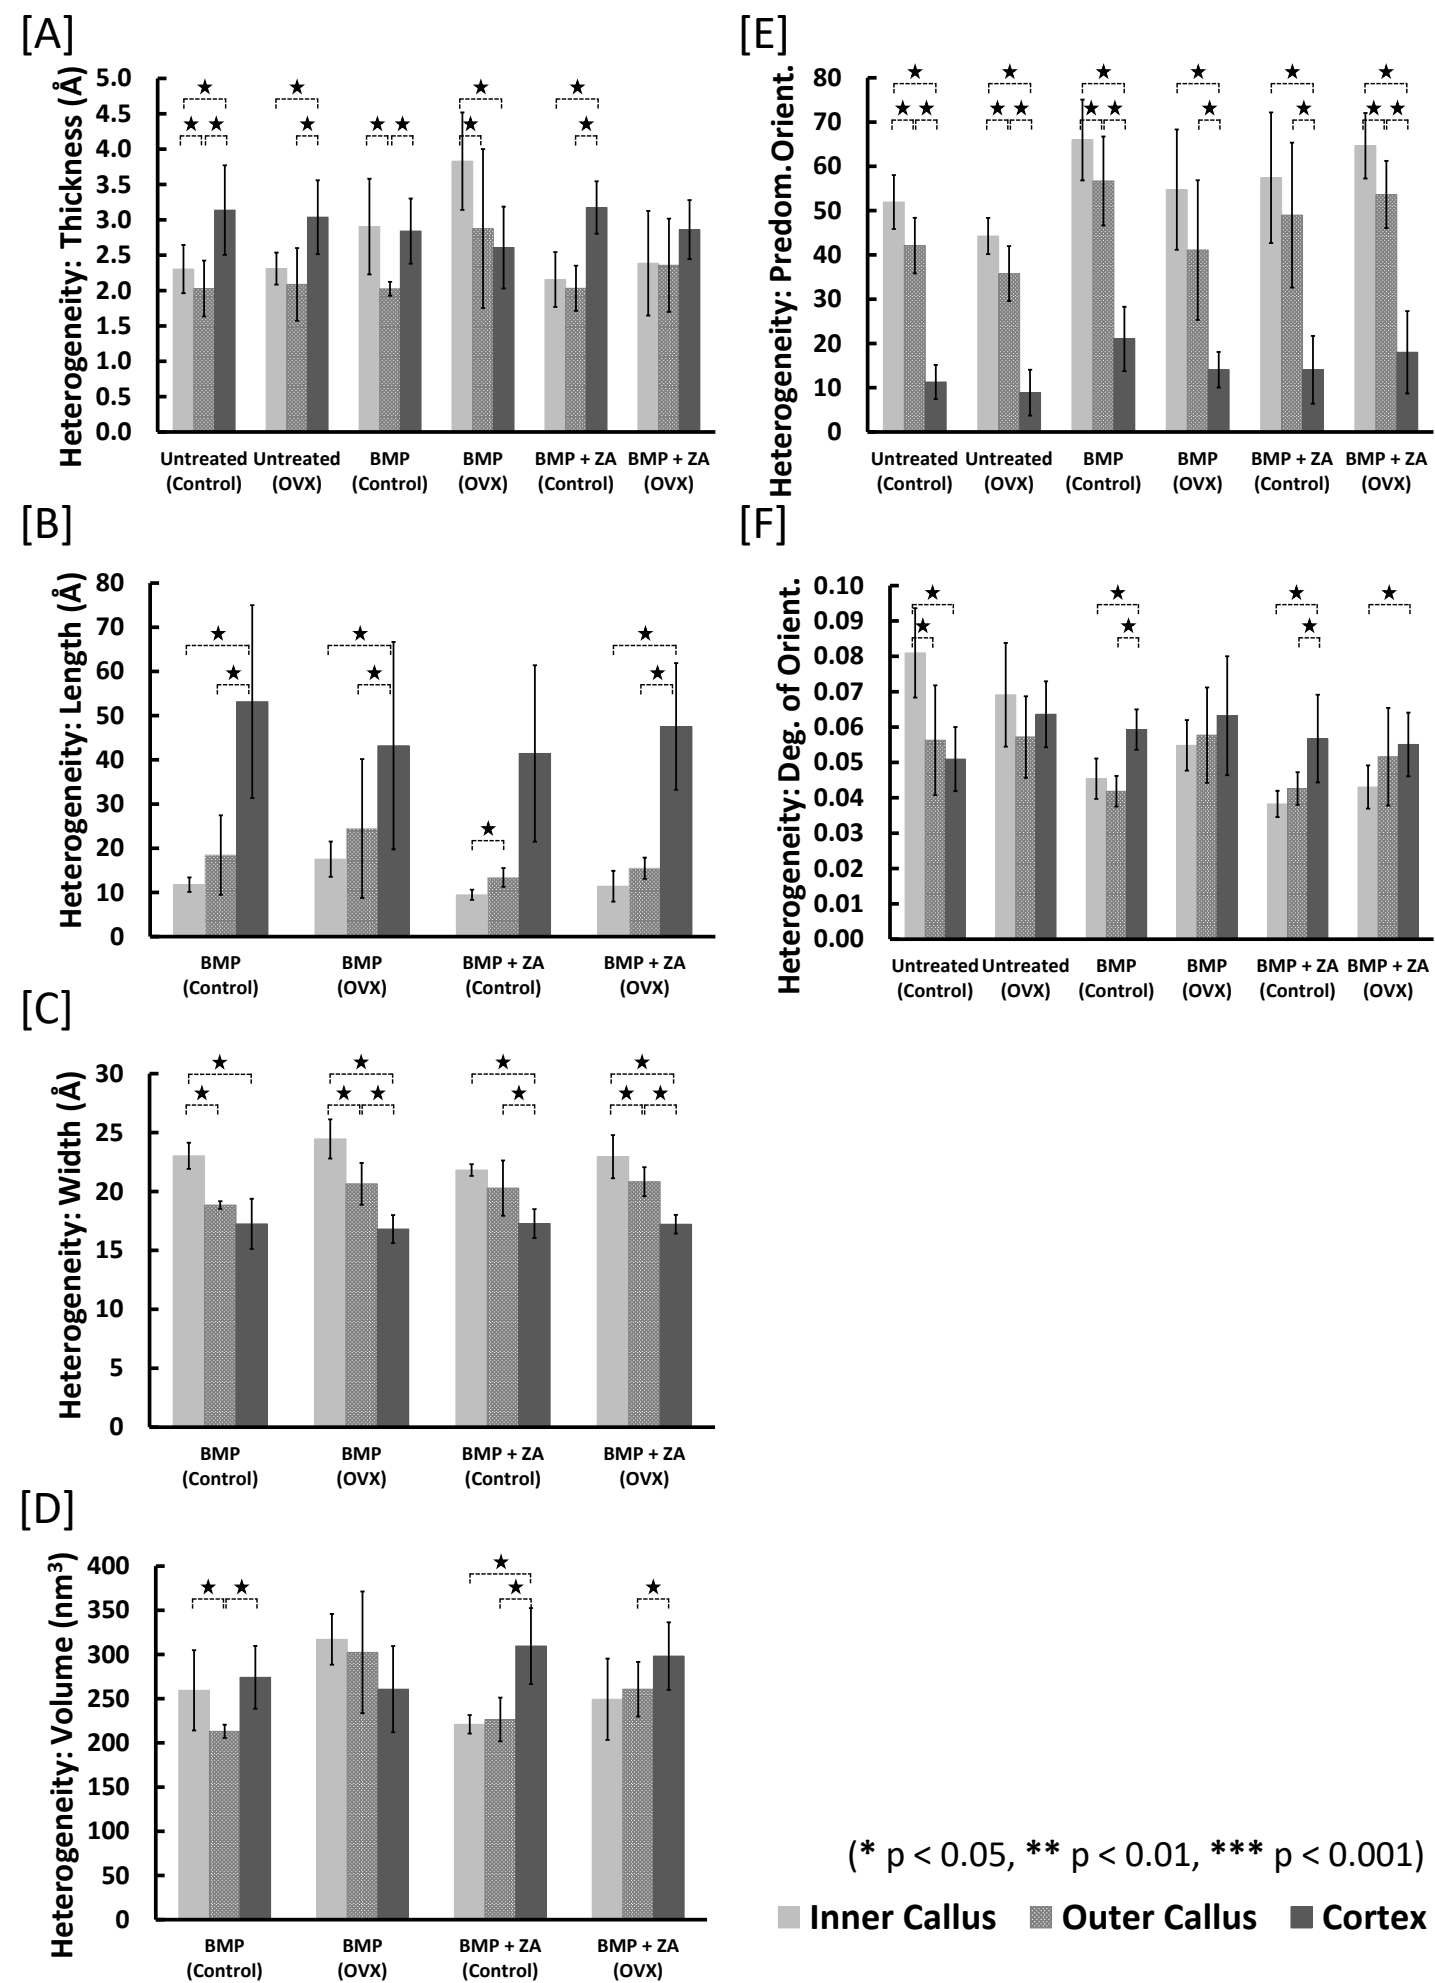

Supplement: 41598_2018_19296_MOESM1_ESM.pdf [file 41598_2018_19296_MOESM1_ESM.pdf]
